# Supplementary material for: Obesity-induced type 2 diabetes impairs neurological recovery after stroke in correlation with decreased neurogenesis and persistent atrophy of parvalbumin-positive interneurons
Source: Oxford University Press journal article supplement (doi:10.1042/cs20190180), 2019-06-24
Supplement: cs-2019-0180_supp.pdf [file cs-2019-0180_supp.pdf]

## SUPPLEMENTARY MATERIAL

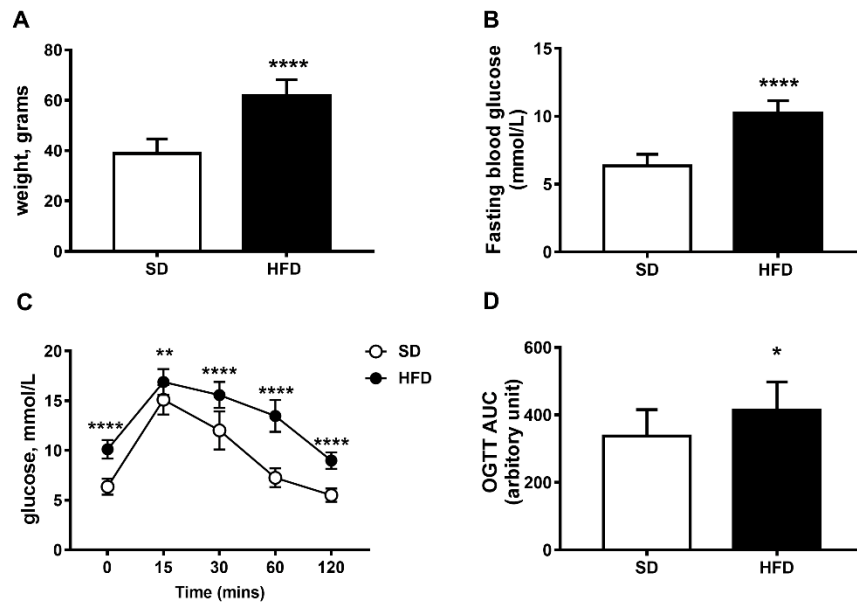

**Supplementary Figure 1. Twelve months HFD feeding induces obesity and T2D in mice.**

Body weight (A), fasting blood glucose (B), blood glucose from oral glucose tolerance test (OGTT) (C), and area under the curve of OGTT (D) after 12 months of HFD-diet feeding. Means  $\pm$  SD, Welch's t-test. \* $p < 0.05$ , \*\*  $p < 0.01$ , and \*\*\*\*  $p < 0.0001$  versus SD. SD-fed mice,  $n=8$  and HFD-fed mice,  $n=8$ .

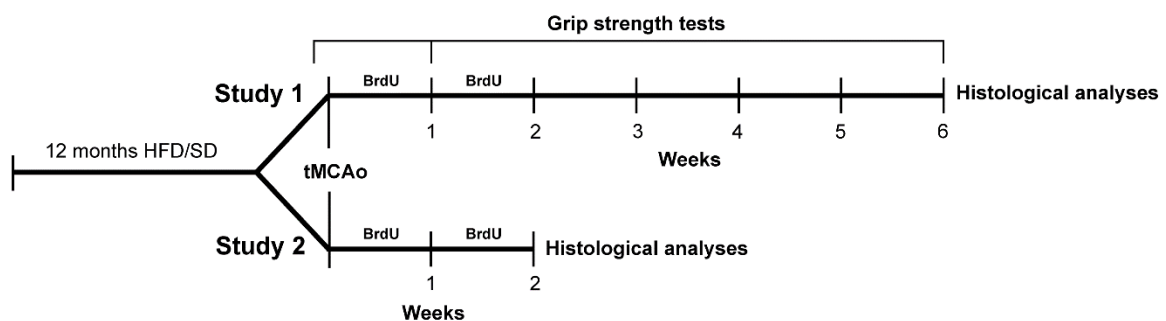

**Supplementary Figure 2. Experimental design**

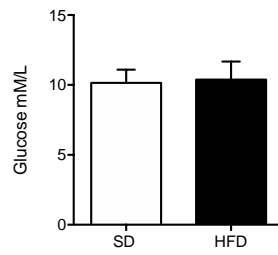

**Supplementary Figure 3. Blood glucose at MCAO time.** Blood glucose was measured after the filament was inserted into the internal carotid artery. SD n=20, HFD n=20).

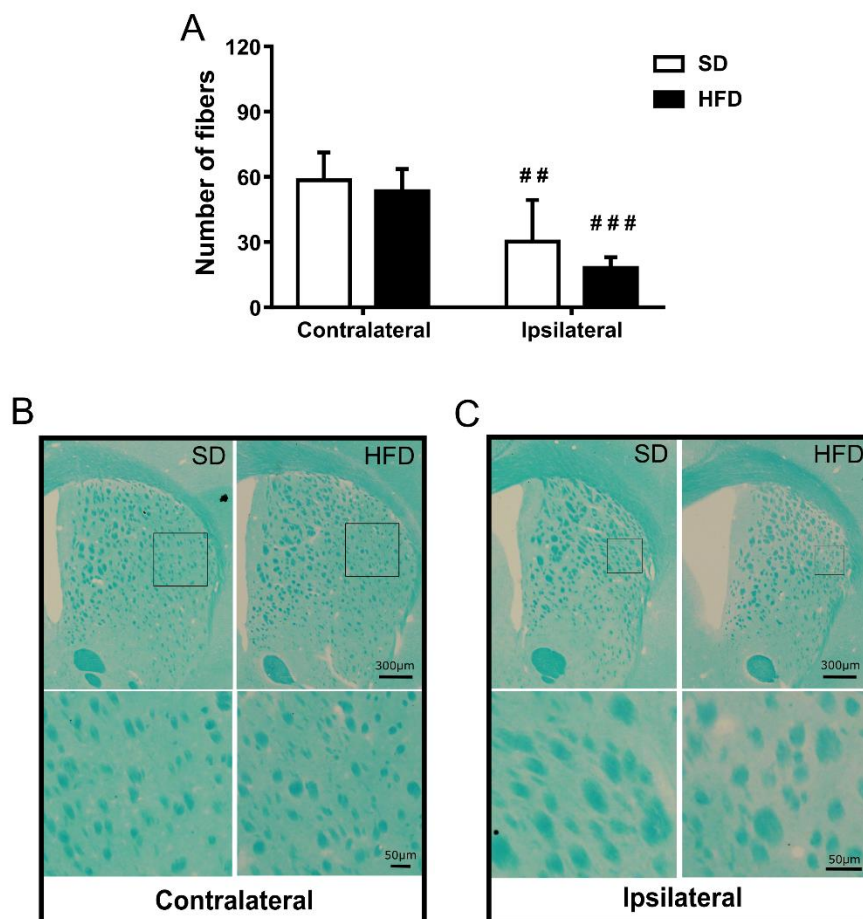

**Supplementary Figure 4. The effects of stroke on the number of neuronal myelin fiber bundles after tMCAO.** The number of neuronal myelin fiber bundles after tMCAO (A).

Means  $\pm$ SD, Two-way ANOVA followed by Tuckey's test. <sup>##</sup>  $p < 0.01$  versus contralateral hemisphere of SD-fed mice, <sup>###</sup>  $p < 0.001$  versus contralateral hemisphere of HFD-fed mice (SD stroke  $n=14$ , HFD stroke  $n=8$ ). Representative images of Luxol fast blue staining of neuronal myelin fiber bundles in SD- and HFD-fed mice at 6 weeks after tMCAO (B and C).

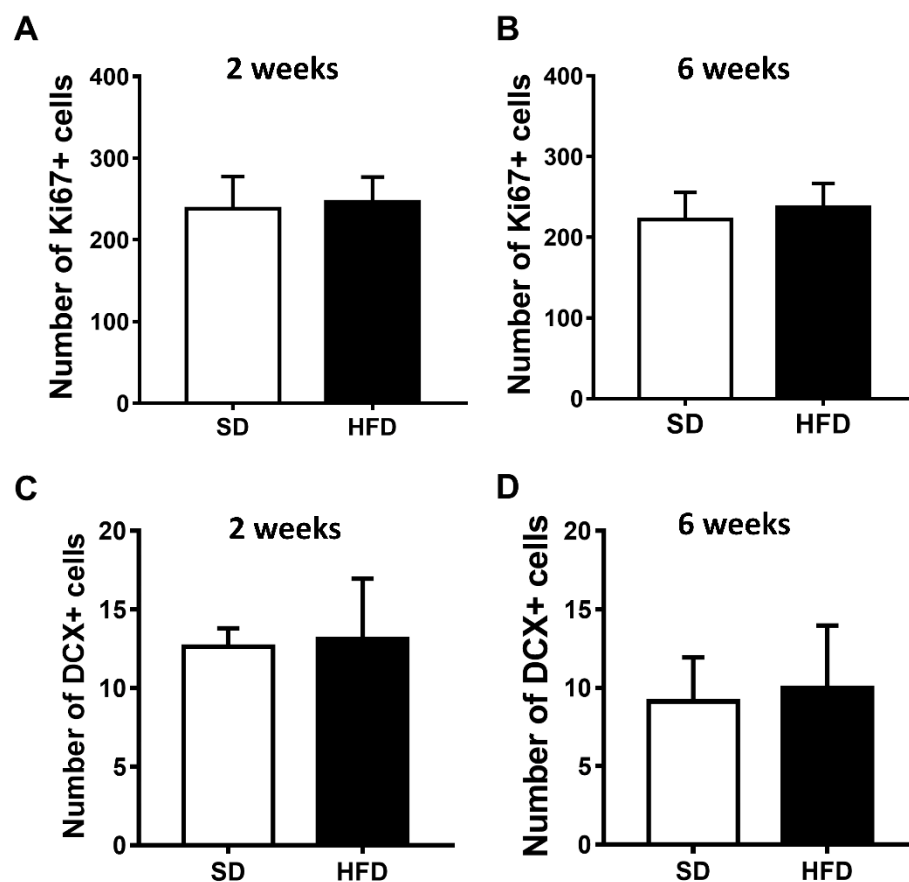

**Supplementary Figure 5. The effects of T2D on neural stem cells proliferation and neuroblast formation at 2 and 6 weeks after sham surgery.** The number of Ki67+ cells in SVZ at 2 and 6 weeks after sham surgery (A and B). The number of DCX+ cells in striatum at 2 and 6 weeks after sham surgery (C and D). Means  $\pm$  SD, Welch's t-test. At 2 weeks after

sham surgery; sham SD-fed mice, n=4 and sham HFD-fed mice, n=4. At 6 weeks after sham surgery; sham SD-fed mice, n=4 and sham HFD-fed mice, n=4.

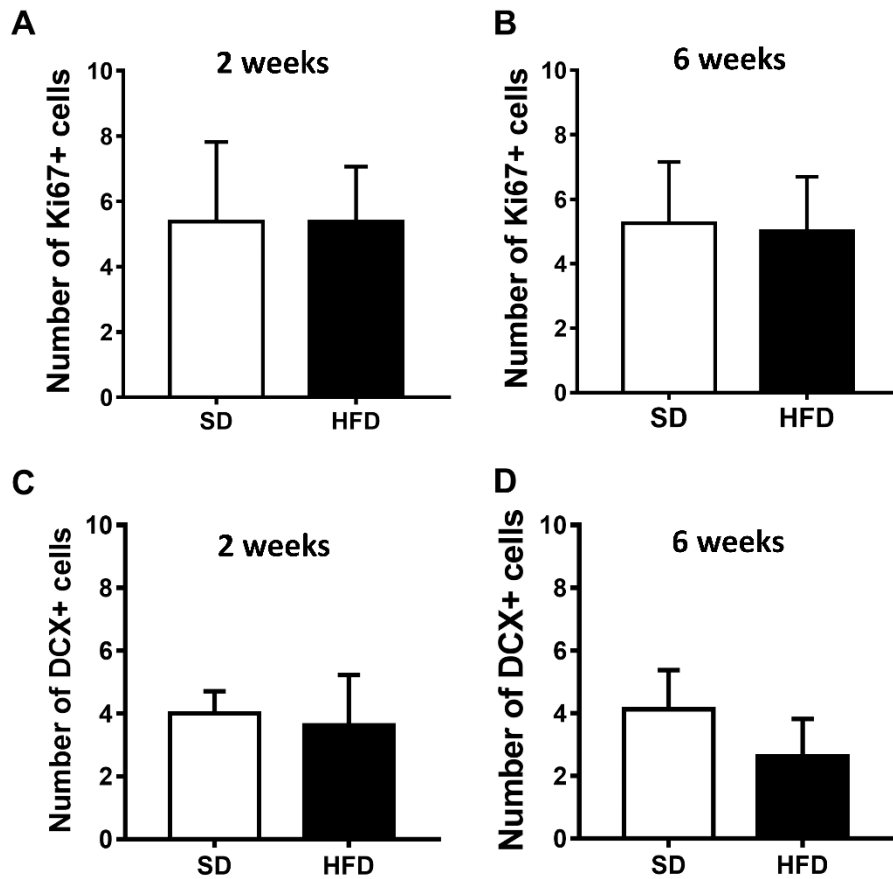

**Supplementary Figure 6. The effects of T2D on neural stem cells proliferation and neuroblast formation at 2 and 6 weeks in these rare gyrus of hippocampus after sham surgery.** The number of Ki67+ cells in SGZ at 2 and 6 weeks (A and B). The number of DCX+ cells in GCL at 2 and 6 weeks (C and D). Means  $\pm$  SD, Welch's t-test. At 2 weeks after sham surgery; sham SD-fed mice, n=4 and sham HFD-fed mice, n=4. At 6 weeks after sham surgery; sham SD-fed mice, n=4 and sham HFD-fed mice, n=4.

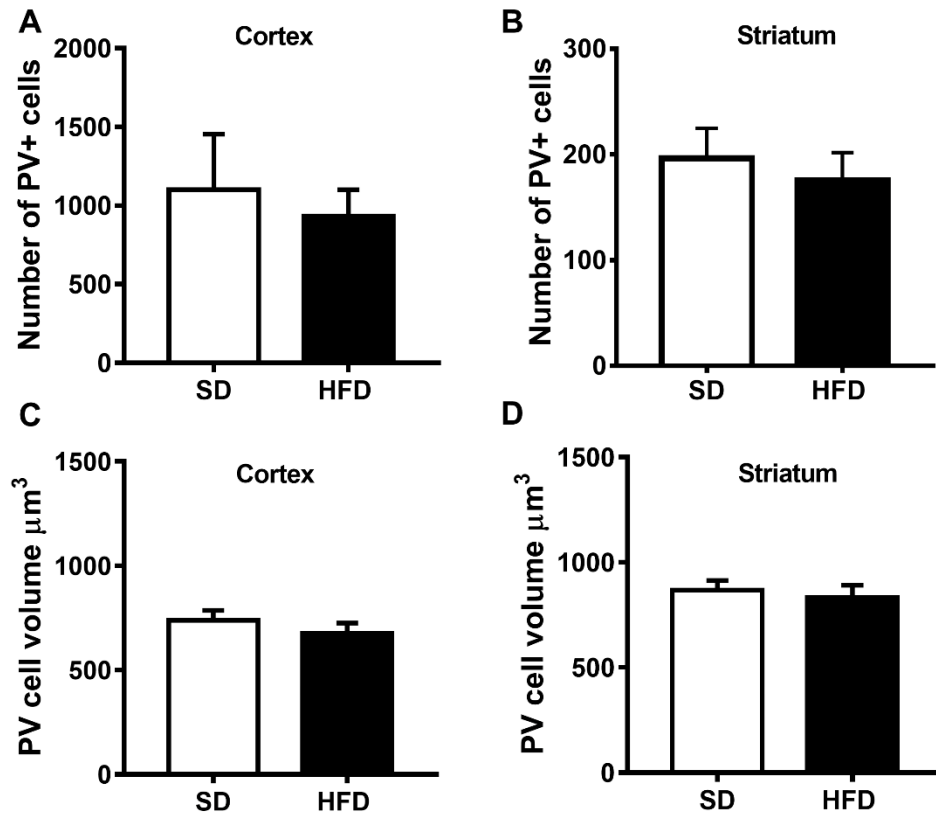

**Supplementary Figure 7. The effects of T2D on the number and soma volume of ---- cortical and striatal PV+ interneurons at 2 weeks after sham surgery.** The number of PV+ interneurons in cortex and striatum (A and B). The PV soma volume in cortex and striatum (C and D). Means  $\pm$  SD, Welch's t-test. sham SD-fed mice, n=4 and sham HFD-fed mice, n=4.

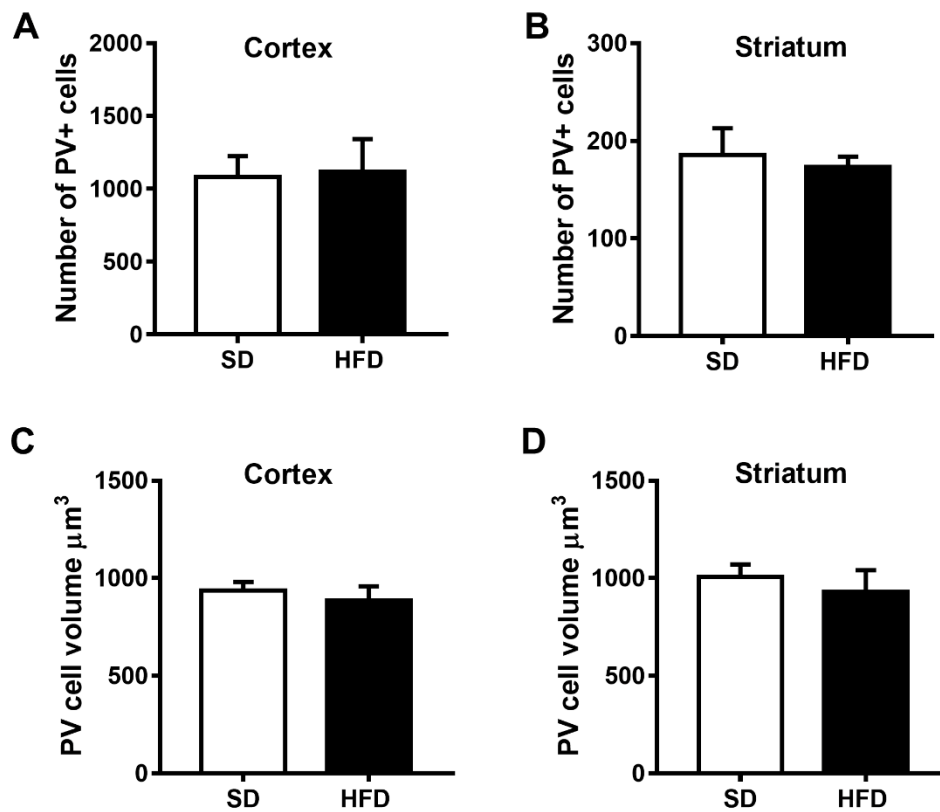

**Supplementary Figure 8. The effects of T2D on the number and soma volume of cortical and striatal PV+ interneurons at 6 weeks after sham surgery.** The number of PV+ interneurons in cortex and striatum (A and B). The PV soma volume in cortex and striatum (C and D). Means  $\pm$  SD, Welch's t-test. sham SD-fed mice, n=4 and sham HFD-fed mice, n=4.
